# Supplementary material for: Myeloid-derived interleukin-1β drives oncogenic KRAS-NF-κΒ addiction in malignant pleural effusion
Source: Springer Nature journal article supplement (doi:10.1038/s41467-018-03051-z), 2018-02-08
Supplement: MOESM1 [file 41467_2018_3051_MOESM1_ESM.pdf › 41467_2018_3051_MOESM1_ESM.pdf]

## ONLINE SUPPLEMENTARY INFORMATION

Myeloid-derived IL-1 $\beta$  drives oncogenic *KRAS*-NF- $\kappa$ B addiction in malignant pleural effusion

Marazioti et al.

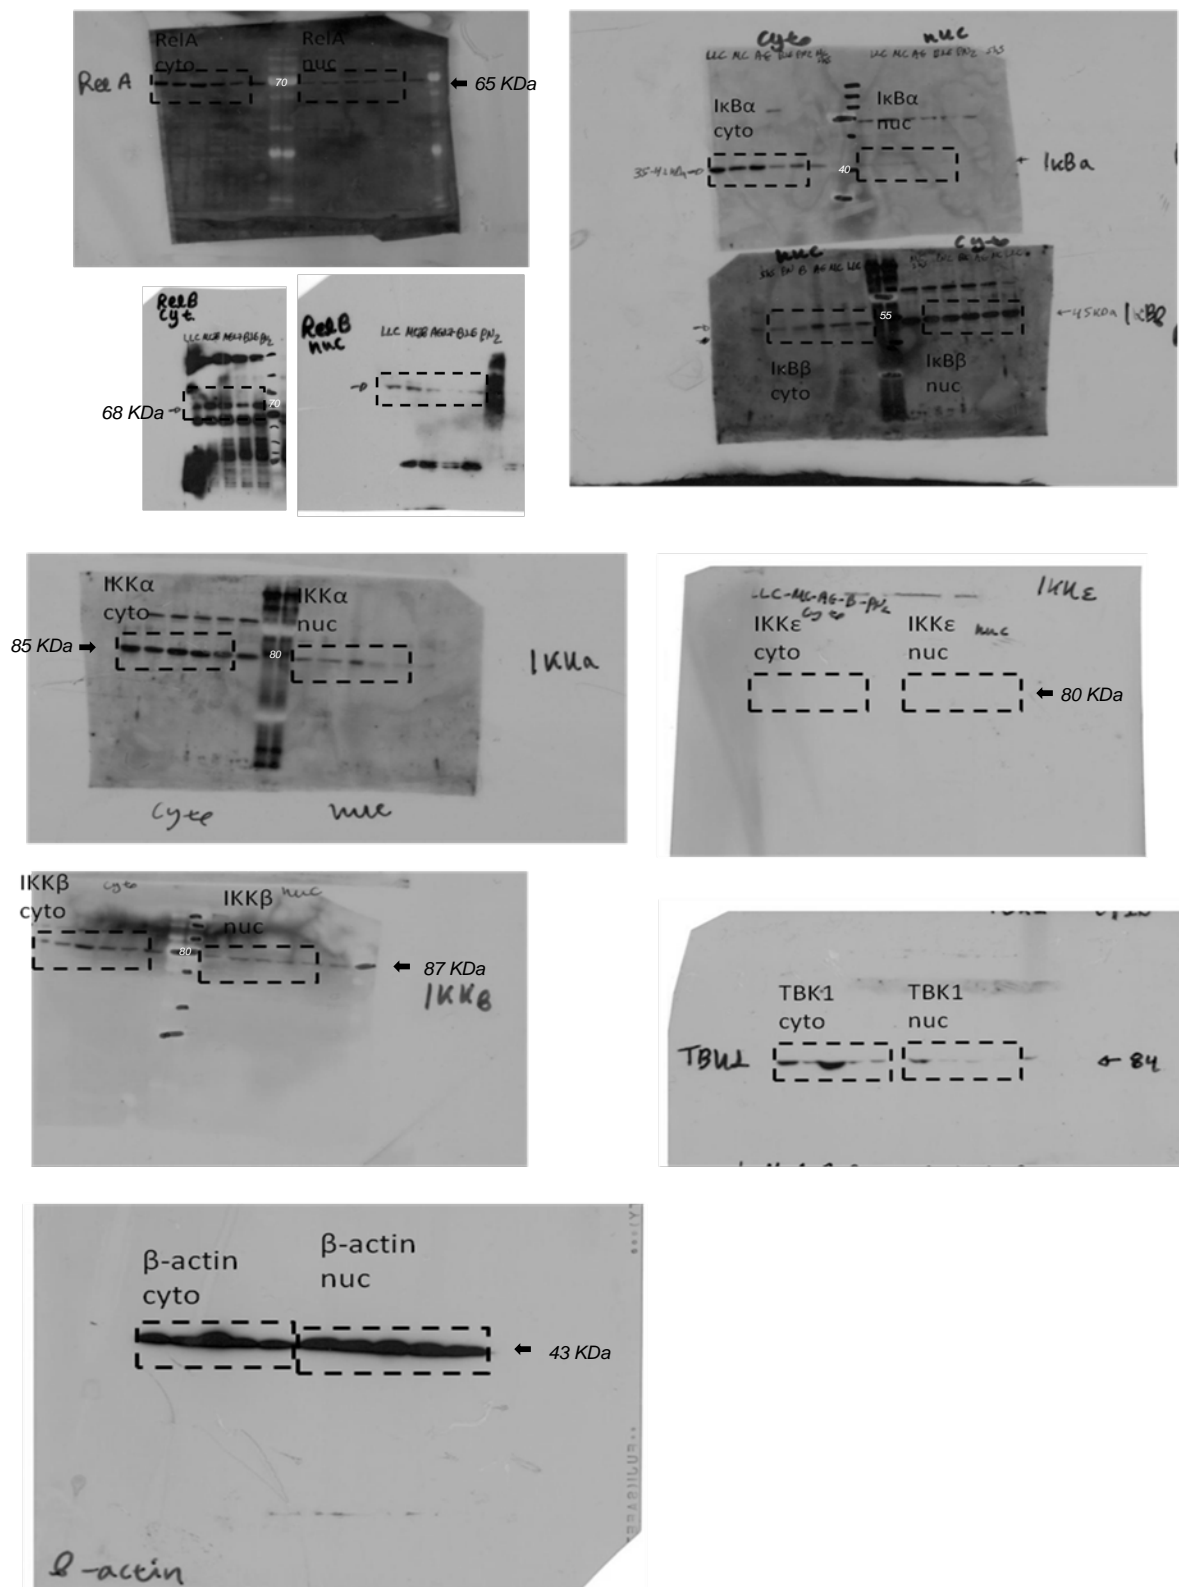

**Supplementary Figure 1.** Full unedited blots for **Fig. 1f**. Dashed lines indicate blot areas shown in the main Figure.

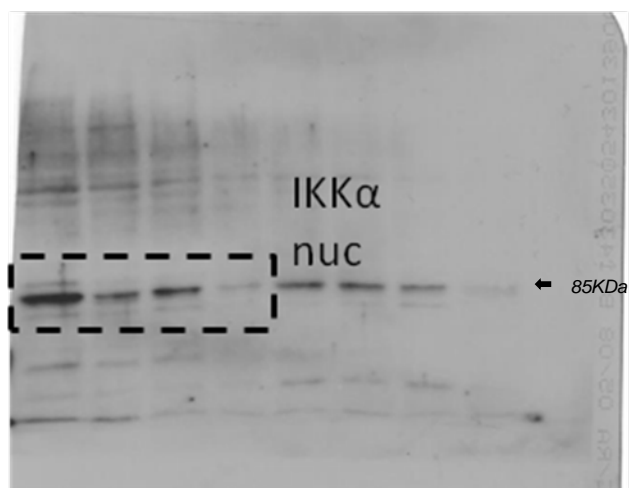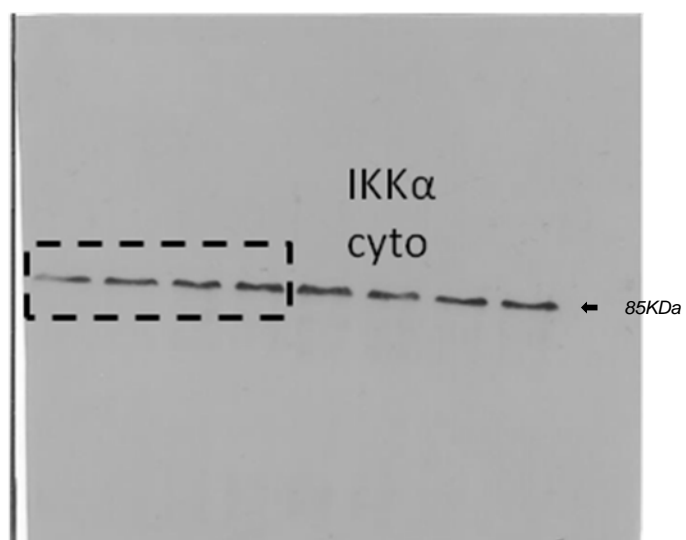

**Supplementary Figure 2.** Full unedited blots for **Fig. 4c**. Dashed lines indicate blot areas shown in the main Figure.

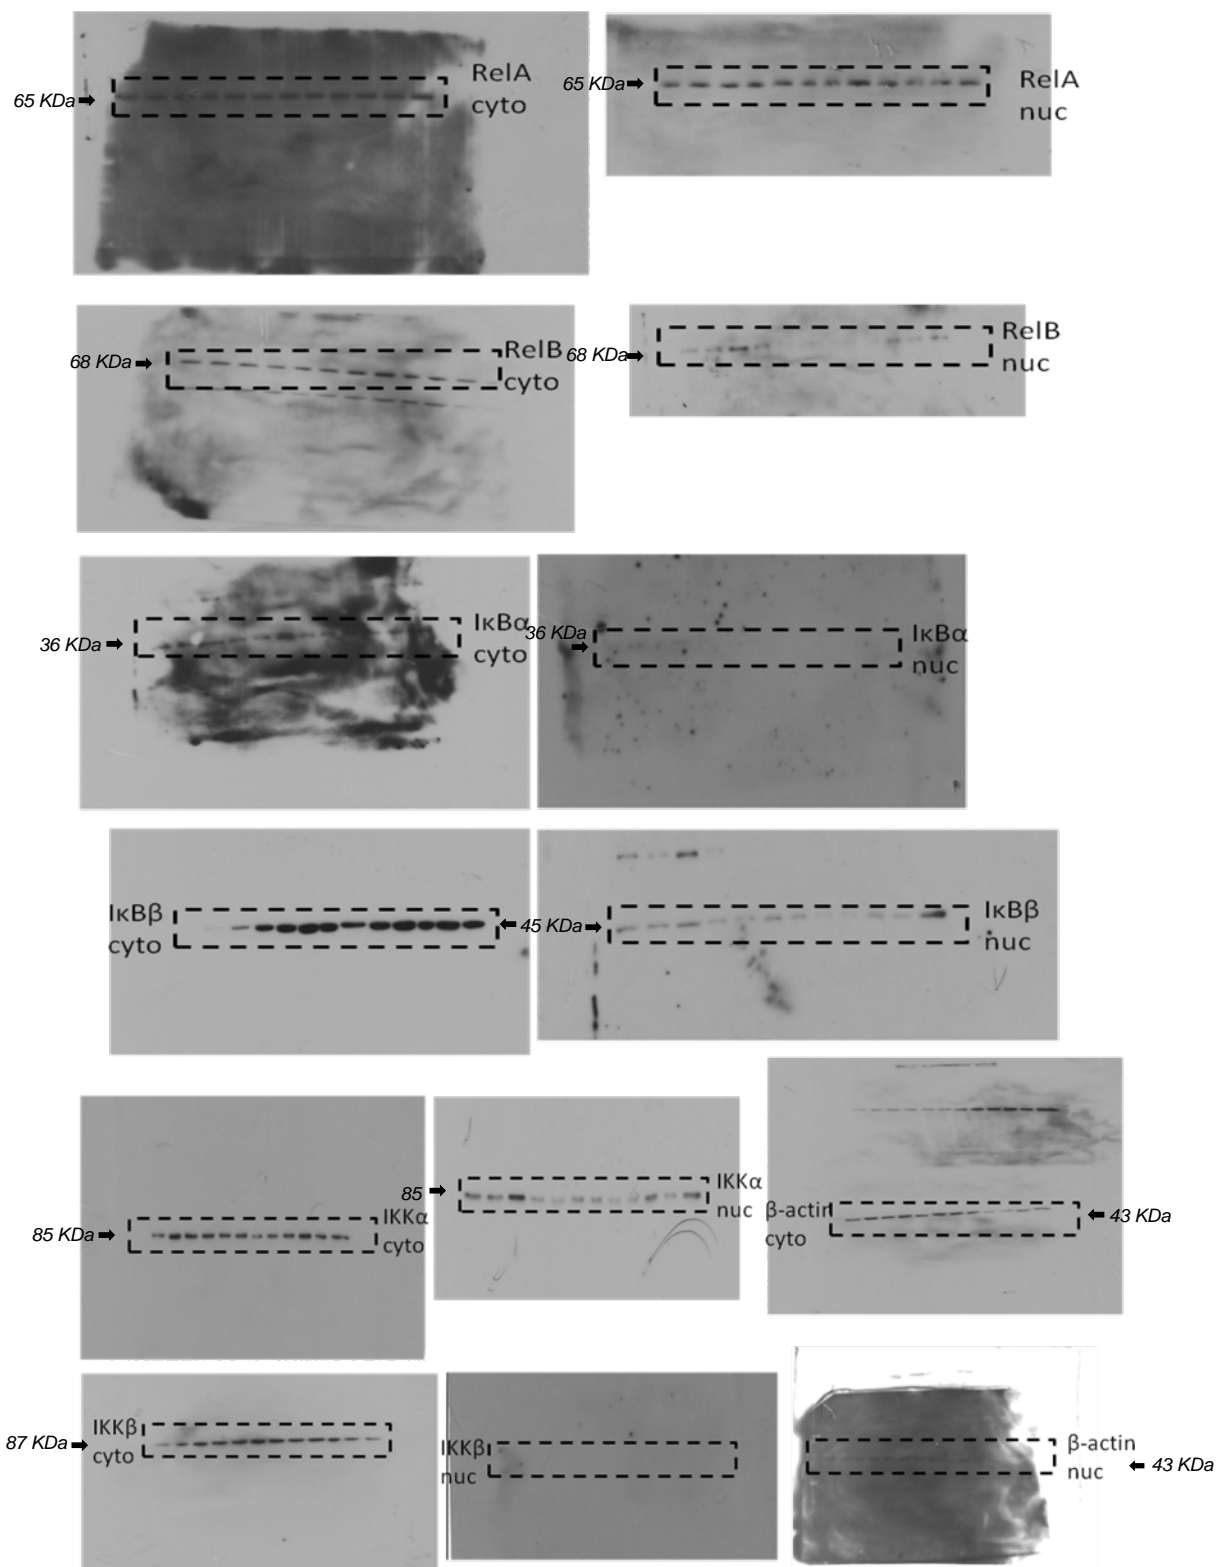

**Supplementary Figure 3.** Full unedited blots for **Fig. 4k**. Dashed lines indicate blot areas shown in the main Figure.

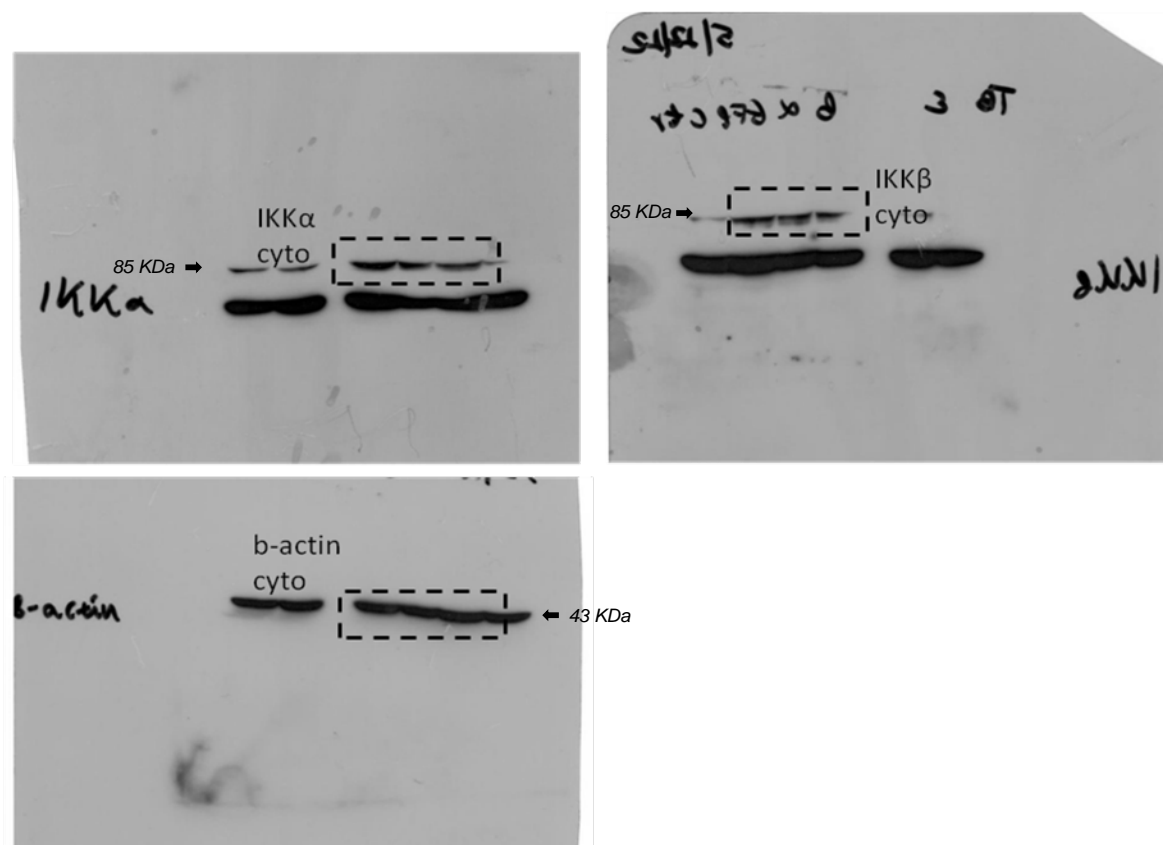

**Supplementary Figure 4.** Full unedited blots for **Fig. 5a**. Dashed lines indicate blot areas shown in the main Figure.

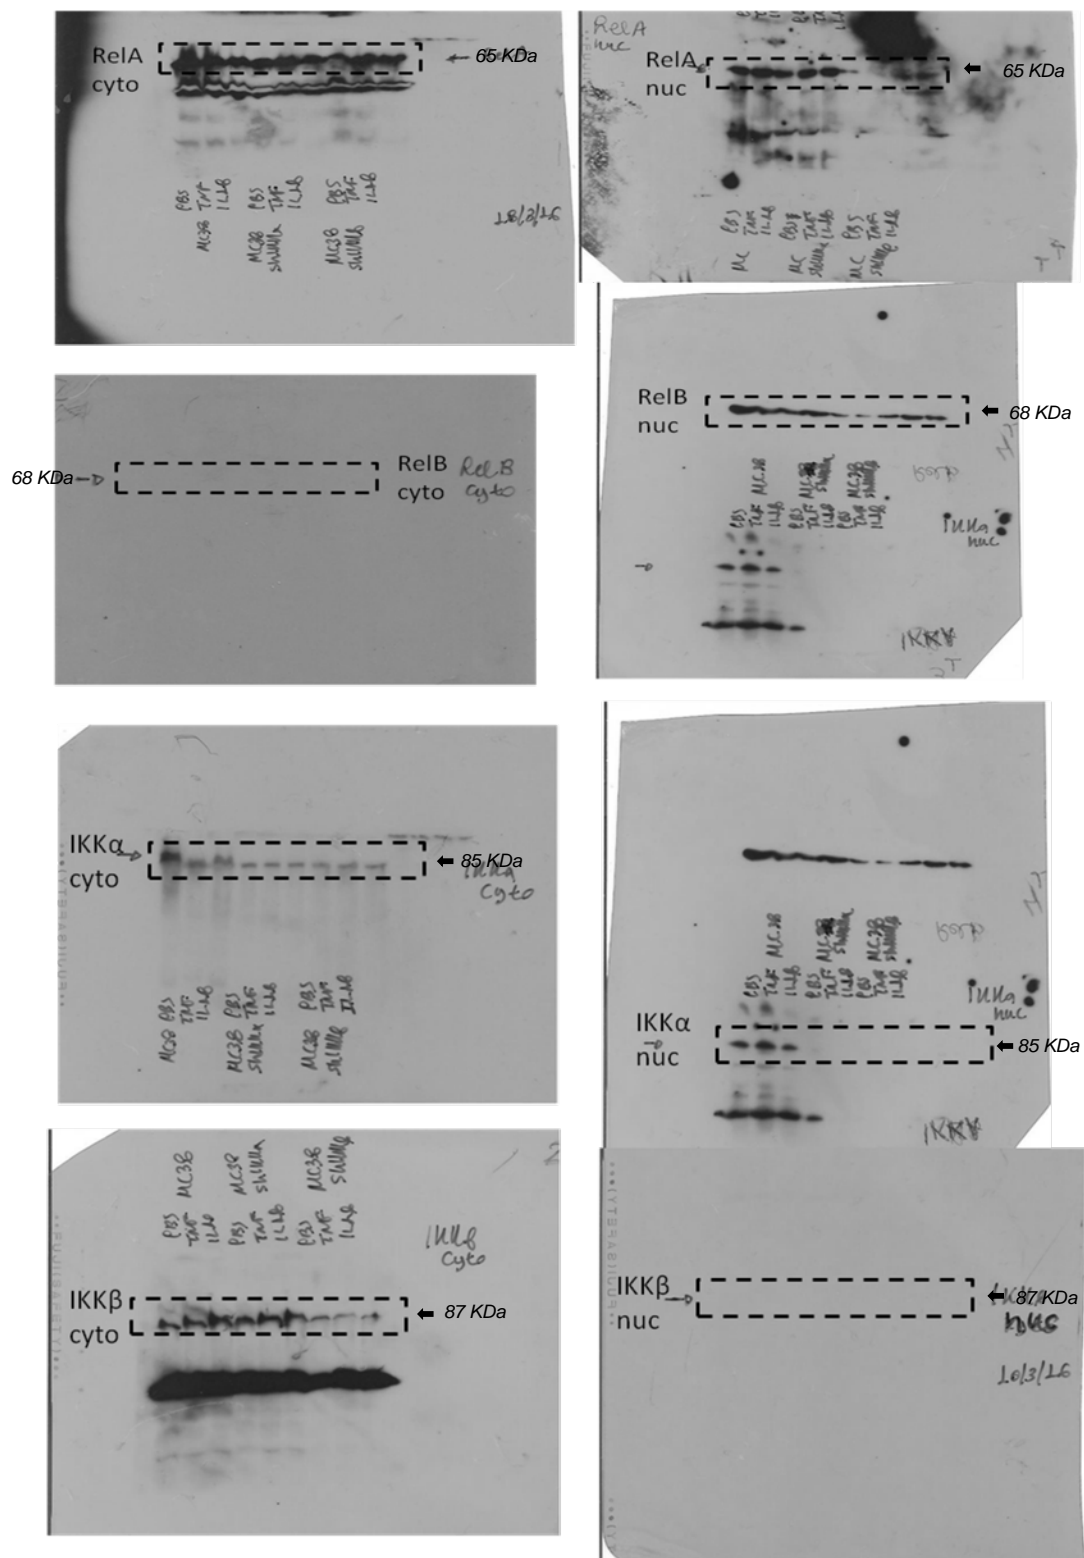

**Supplementary Figure 5.** Full unedited blots for **Fig. 5e**. Dashed lines indicate blot areas shown in the main Figure.

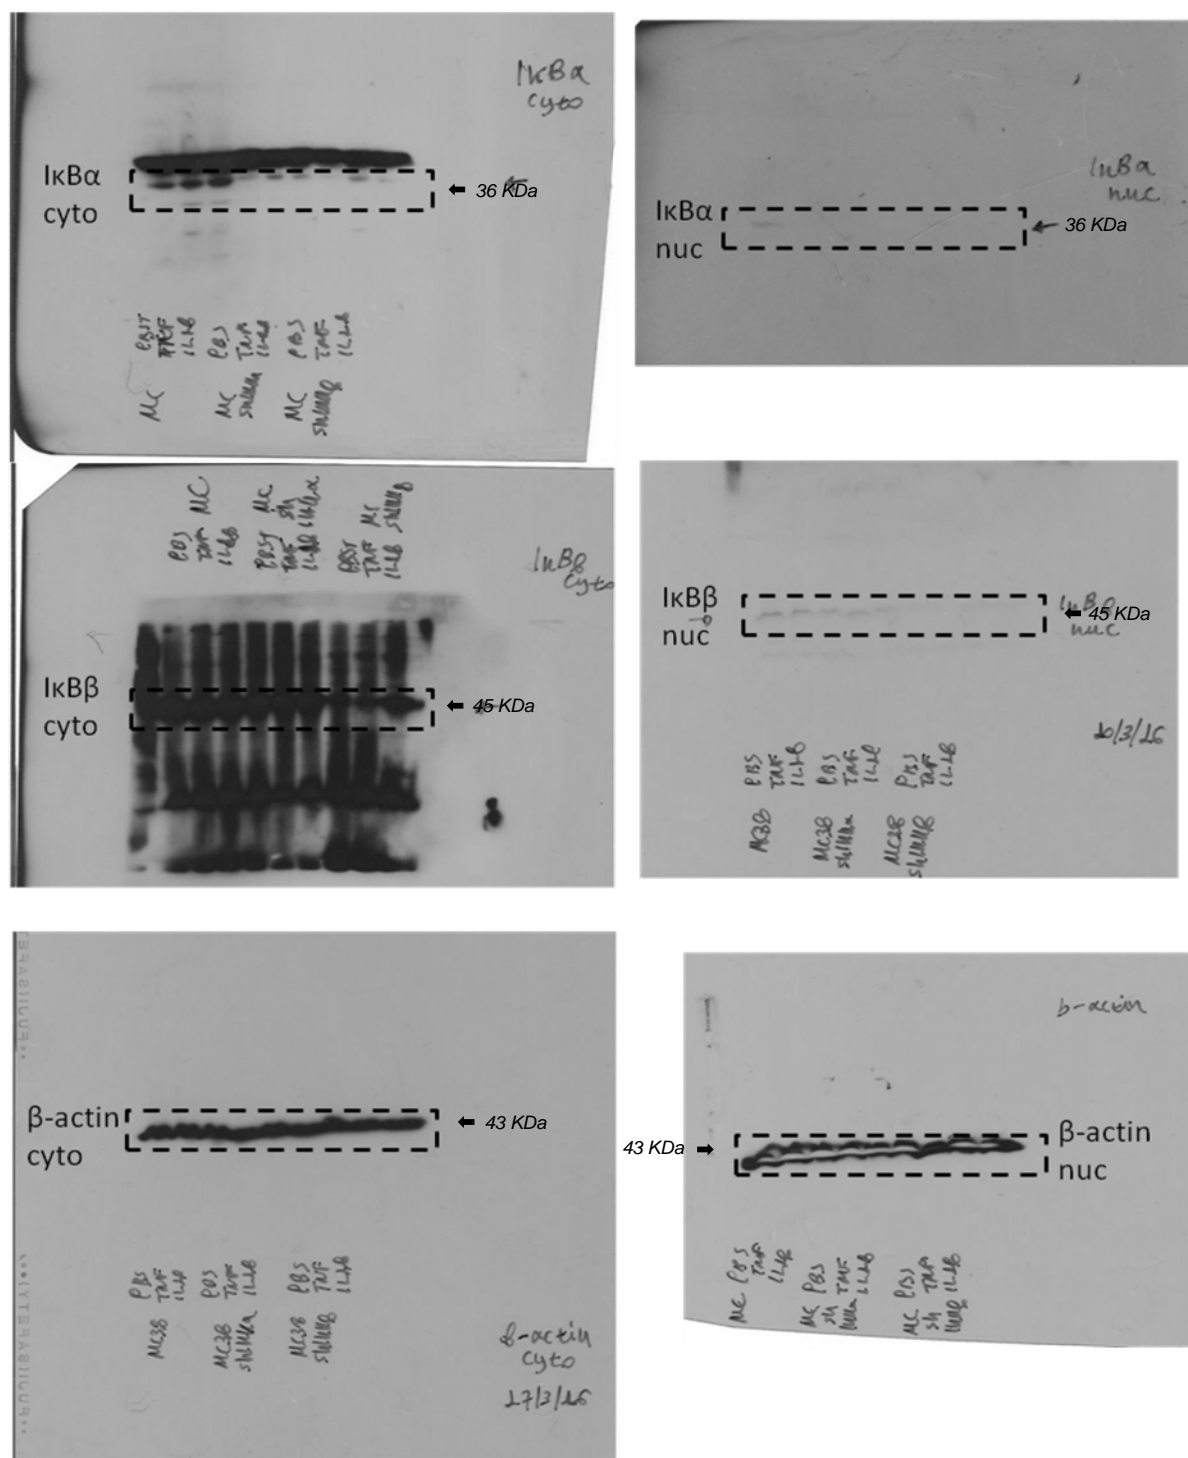

**Supplementary Figure 6.** Full unedited blots for **Fig. 5e** continued. Dashed lines indicate blot areas shown in the main Figure.

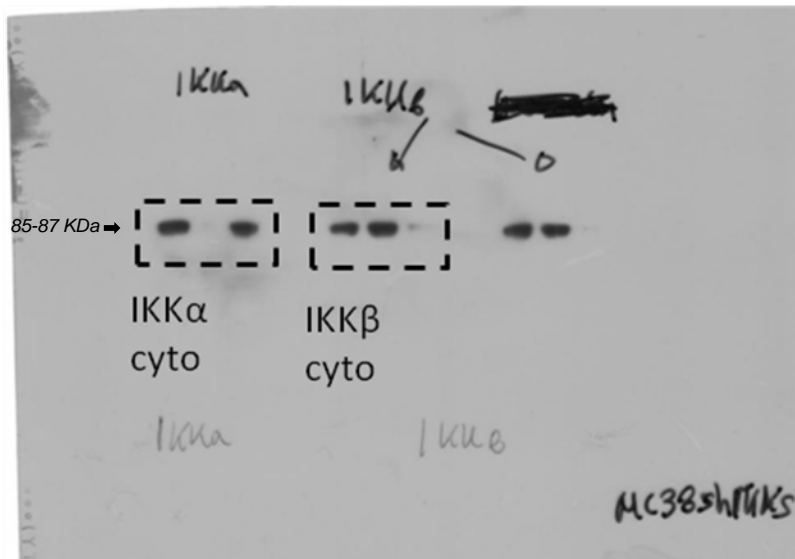

**Supplementary Figure 7.** Full unedited blots for **Fig. 6d**. Dashed lines indicate blot areas shown in the main Figure.



**Supplementary Table 1. Inhibitory activity of the proteasome inhibitor bortezomib, the IKK $\beta$ -specific inhibitor IMD-0354, and the HSP90 and dual IKK $\alpha$ /IKK $\beta$  inhibitor 17-DMAG on NF- $\kappa$ B reporter activity and cellular proliferation of *KRAS*-mutant and *KRAS*-wild-type murine cell lines** A detailed description of the experiments is given in Fig.1.

|                   | <b>LLC</b><br>( <i>KRAS</i> <sup>G12C</sup> )                                                | <b>MC38</b><br>( <i>KRAS</i> <sup>G13R</sup> ) | <b>AE17</b><br>( <i>KRAS</i> <sup>G12C</sup> ) | <b>B16F10</b><br>( <i>KRAS</i> <sup>WT</sup> ) <sup>a</sup> | <b>PANO2</b><br>( <i>KRAS</i> <sup>WT</sup> ) <sup>a</sup> |                      |
|-------------------|----------------------------------------------------------------------------------------------|------------------------------------------------|------------------------------------------------|-------------------------------------------------------------|------------------------------------------------------------|----------------------|
|                   | <b>NF-<math>\kappa</math>B IC<sub>50</sub><sup>b</sup></b><br>[ $\mu$ M; n = 3; mean(95%CI)] |                                                |                                                |                                                             |                                                            | <b>P<sup>d</sup></b> |
| <b>bortezomib</b> | nd                                                                                           | nd                                             | nd                                             | 0.12<br>(0.05-0.16)                                         | 0.23<br>(0.10-0.43)                                        | nd                   |
| <b>IMD-0354</b>   | 27.55<br>(13.38-56.73)                                                                       | 9.21<br>(6.53-13.00)                           | 4.04<br>(3.01-5.43)                            | 0.03<br>(0.02-0.03)                                         | 0.03<br>(0.01-0.08)                                        | < 0.0001             |
| <b>17-DMAG</b>    | 0.13<br>(0.07-0.24)                                                                          | 0.57<br>(0.29-1.11)                            | 0.06<br>(0.03-0.10)                            | 0.04<br>(0.00-0.06)                                         | 0.23<br>(0.16-0.33)                                        | < 0.0001             |
|                   | <b>MTT IC<sub>50</sub><sup>c</sup></b><br>[ $\mu$ M; n = 3-4; mean(95%CI)]                   |                                                |                                                |                                                             |                                                            |                      |
| <b>bortezomib</b> | 1.89<br>(1.21-2.94)                                                                          | 1.29<br>(0.86-1.94)                            | 1.05<br>(0.75-1.47)                            | 0.14<br>(0.09-0.20)                                         | 0.33<br>(0.20-0.53)                                        | < 0.0001             |
| <b>IMD-0354</b>   | 10.37<br>(5.66-19.00)                                                                        | 29.35<br>(11.02-78.18)                         | 54.68<br>(25.08-119.20)                        | 0.06<br>(0.04-0.10)                                         | 0.65<br>(0.33-1.26)                                        | < 0.0001             |
| <b>17-DMAG</b>    | 1.94<br>(0.79-4.73)                                                                          | 2.57<br>(0.86-7.73)                            | 4.65<br>(2.13-10.18)                           | 11.85<br>(3.50-40.18)                                       | 20.82<br>(8.87-48.9)                                       | 0.0042               |

<sup>a</sup> WT, wild-type.

<sup>b</sup> NF- $\kappa$ B IC<sub>50</sub>, 50% inhibitory concentration of pNGL NF- $\kappa$ B reporter activity by bioluminescence imaging of live cells.

<sup>c</sup> MTT IC<sub>50</sub>, 50% inhibitory concentration of 3-(4,5-dimethylthiazol-2-yl)-2,5-diphenyltetrazolium bromide reduction capacity.

<sup>d</sup> P, probability of no difference between cell lines by extra sum-of-squares F test.

LLC, *C57BL/6* Lewis lung carcinoma; MC38, *C57BL/6* colon adenocarcinoma; AE17, *C57BL/6* malignant pleural mesothelioma; B16F10, *C57BL/6* malignant skin melanoma; PANO2, *C57BL/6* pancreatic adenocarcinoma.

**Supplementary Table 2. Inducibility of NF- $\kappa$ B reporter activity of *KRAS*-mutant and *KRAS*-wild-type murine cell lines by 60 different candidate ligands** A detailed description of the experiments is given in Fig. 2.

|               |   |               |     |                     |       |
|---------------|---|---------------|-----|---------------------|-------|
| CCL11         | - | IGF           | -   | IL-31               | -     |
| CCL19         | - | IL-10         | -   | IL-33               | -     |
| CCL2          | - | IL-11         | -   | IL-4                | -     |
| CCL20         | - | IL-13         | -   | IL-5                | -     |
| CCL3          | - | IL-15         | -   | IL-6                | -     |
| CCL4          | - | IL-16         | -   | IL-7                | -     |
| CCL5          | - | IL-17A        | -   | IL-9                | -     |
| CD135         | - | IL-17C        | -   | LIF                 | -     |
| CD40L         | - | IL-17F        | -   | LPS                 | LMABP |
| CXCL1         | - | IL-18         | -   | LT $\beta$          | LMAB  |
| CXCL10        | - | IL-19         | -   | MCSF                | -     |
| CXCL12a       | - | IL-1 $\alpha$ | LMA | NGF                 | -     |
| CXCL12b       | - | IL-1 $\beta$  | LMA | PDGF $\alpha\alpha$ | -     |
| CXCL2         | - | IL-2          | -   | PDGF $\beta\beta$   | -     |
| EGF           | - | IL-20         | -   | SCF                 | -     |
| FGF1          | - | IL-21         | -   | SPP1                | -     |
| FGF2          | - | IL-22         | -   | TGF                 | -     |
| GCSF          | - | IL-25         | -   | TNF                 | LMABP |
| GMCSF         | - | IL-27         | -   | TPO                 | -     |
| IFN- $\gamma$ | - | IL-3          | -   | VEGF                | -     |

L, induced > 2-fold in Lewis lung carcinoma (LLC) cells (*Kras*<sup>G12C</sup> mutant).  
M, induced > 2-fold in MC38 colon adenocarcinoma cells (*Kras*<sup>G13R</sup> mutant).  
A, induced > 2-fold in AE17 malignant pleural mesothelioma cells (*Kras*<sup>G12C</sup> mutant).  
B, induced > 2-fold in B16F10 malignant skin melanoma cells (*Kras* wild-type).  
P, induced > 2-fold in PANO2 pancreatic adenocarcinoma cells (*Kras* wild-type).

CCL; C-C motif chemokine ligand; CXCL, C-X-C motif chemokine ligand; EGF, epidermal growth factor; FGF1, fibroblast growth factor; GCSF, granulocyte colony stimulating factor; GMCSF, granulocyte-macrophage colony stimulating factor; IFN, interferon; IGF, insulin growth factor; IL, interleukin; LIF, leukemia inhibitory factor; LT $\beta$ , lymphotoxin  $\beta$ ; MCSF, macrophage colony stimulating factor; NGF, nerve growth factor; PDGF, platelet-derived growth factor; SCF, stem cell factor; SPP, secreted phosphoprotein; TGF, transforming growth factor; TNF, tumor necrosis factor; TPO, thyroid peroxidase; VEGF, vascular endothelial growth factor.

**Supplementary Table 3. Incidence of experimental malignant pleural effusions (MPE)** MPE incidence in *in vivo* experiments from Figures 6-9. Shown are numbers of mice (*n*) and probability (*P*) for comparison with controls (top row of each experiment) by Fischer's exact test or for overall comparison within each experiment by  $\chi^2$  tests.

|                                                                                                                                                                                                        | Groups                      | No MPE | MPE | <i>P</i> |
|--------------------------------------------------------------------------------------------------------------------------------------------------------------------------------------------------------|-----------------------------|--------|-----|----------|
| <b>Experiment from Figs. 6A-C</b><br>LLC-induced MPE.<br>Cells stably expressing control or anti-IKK-specific shRNAs.                                                                                  | shC                         | 1      | 18  | 1.0000   |
|                                                                                                                                                                                                        | shChuk                      | 10     | 6   | 0.0006   |
|                                                                                                                                                                                                        | shIkbkb                     | 3      | 12  | 0.2994   |
|                                                                                                                                                                                                        | shIkbke                     | 8      | 10  | 0.0078   |
|                                                                                                                                                                                                        | shTbk1                      | 3      | 12  | 0.2994   |
| $\chi^2 P = 0.0021$                                                                                                                                                                                    |                             |        |     |          |
| <b>Experiment from Figs. 6D-F</b><br>MC38-induced MPE.<br>Cells stably expressing control or anti-IKK-specific shRNAs.                                                                                 | shC                         | 1      | 7   | 1.0000   |
|                                                                                                                                                                                                        | shChuk                      | 6      | 2   | 0.0406   |
|                                                                                                                                                                                                        | shIkbkb                     | 2      | 6   | 1.0000   |
| $\chi^2 P = 0.0239$                                                                                                                                                                                    |                             |        |     |          |
| <b>Experiment from Figs. 6G-I</b><br>PANO2-induced MPE.<br>Cells stably expressing control or IKK $\alpha$ , IKK $\beta$ , or mutant <i>Kras</i> <sup>G12C</sup> expression plasmids.                  | pC                          | 9      | 1   | 1.0000   |
|                                                                                                                                                                                                        | pChuk                       | 9      | 1   | 1.0000   |
|                                                                                                                                                                                                        | pIkbkb                      | 10     | 0   | 1.0000   |
|                                                                                                                                                                                                        | pKras <sup>G12C</sup>       | 0      | 10  | 0.0001   |
| $\chi^2 P = 0.0239$                                                                                                                                                                                    |                             |        |     |          |
| <b>Experiment from Fig. 7A</b><br>LLC-induced MPE. Wild-type (C57BL/6), TNF ( <i>Tnf</i> <sup>-/-</sup> ), and IL-1 $\beta$ ( <i>Il1b</i> <sup>-/-</sup> ) deficient mice.                             | C57BL/6                     | 4      | 14  | 1.0000   |
|                                                                                                                                                                                                        | <i>Tnf</i> <sup>-/-</sup>   | 1      | 17  | 0.3377   |
|                                                                                                                                                                                                        | <i>Il1b</i> <sup>-/-</sup>  | 17     | 1   | < 0.0001 |
| $\chi^2 P < 0.0001$                                                                                                                                                                                    |                             |        |     |          |
| <b>Experiment from Fig7B</b><br>MC38-induced MPE.<br>Wild-type (C57BL/6), TNF ( <i>Tnf</i> <sup>-/-</sup> ), and IL-1 $\beta$ ( <i>Il1b</i> <sup>-/-</sup> ) deficient mice.                           | C57BL/6                     | 1      | 9   | 1.0000   |
|                                                                                                                                                                                                        | <i>Tnf</i> <sup>-/-</sup>   | 0      | 10  | 1.0000   |
|                                                                                                                                                                                                        | <i>Il1b</i> <sup>-/-</sup>  | 8      | 2   | 0.0055   |
| $\chi^2 P = 0.0001$                                                                                                                                                                                    |                             |        |     |          |
| <b>Experiment from Fig. 7E</b><br>LLC-induced MPE.<br><i>Il1b</i> <sup>-/-</sup> mice transplanted with bone marrow from wild-type, <i>Tnf</i> <sup>-/-</sup> , and <i>Il1b</i> <sup>-/-</sup> donors. | C57BL/6                     | 0      | 10  | 1.0000   |
|                                                                                                                                                                                                        | <i>Tnf</i> <sup>-/-</sup>   | 2      | 6   | 0.1830   |
|                                                                                                                                                                                                        | <i>Il1b</i> <sup>-/-</sup>  | 9      | 2   | 0.0002   |
| $\chi^2 P = 0.0004$                                                                                                                                                                                    |                             |        |     |          |
| <b>Experiment from Fig. 8F</b><br>LLC-induced MPE. Wild-type (C57BL/6), CXCR1 ( <i>Cxcr1</i> <sup>-/-</sup> ), and CXCR2 ( <i>Cxcr2</i> <sup>+/-</sup> ) deficient mice.                               | C57BL/6                     | 0      | 11  | 1.0000   |
|                                                                                                                                                                                                        | <i>Cxcr1</i> <sup>-/-</sup> | 5      | 6   | 0.0351   |
|                                                                                                                                                                                                        | <i>Cxcr2</i> <sup>+/-</sup> | 5      | 6   | 0.0351   |
| $\chi^2 P = 0.0277$                                                                                                                                                                                    |                             |        |     |          |
| <b>Experiment from Fig. 9C</b><br>LLC-induced MPE. C57BL/6 mice treated with daily intraperitoneal PBS, deltarasin, 17-DMAG, or deltarasin/17-DMAG (all at 15 mg/Kg in 100 $\mu$ L PBS).               | PBS                         | 0      | 14  | 1.0000   |
|                                                                                                                                                                                                        | deltarasin                  | 2      | 12  | 0.4815   |
|                                                                                                                                                                                                        | 17-DMAG                     | 2      | 12  | 0.4815   |
|                                                                                                                                                                                                        | Deltarasin + 17-DMAG        | 6      | 8   | 0.0159   |
| $\chi^2 P = 0.0261$                                                                                                                                                                                    |                             |        |     |          |

LLC, C57BL/6 Lewis lung carcinoma; IKK, I $\kappa$ B kinase; MC38, C57BL/6 colon adenocarcinoma; Tnf, tumor necrosis factor; Il, interleukin; CXCR, C-X-C-motif chemokine receptor.

**Supplementary Table 4. Microarray results from LLC cells** Thirty transcripts altered more than 1.3-fold in Lewis lung adenocarcinoma cells treated with 20 ng/mL rmlL-1 $\beta$  (in one direction) and in Lewis lung carcinoma cells stably expressing anti-*Kras* or anti-*Chuk* shRNA (in the other direction), as assessed by microarray (mouse Gene ST2.0, Affymetrix, Sta.Clara, CA). A positive  $\Delta$ GE indicates induction and a negative  $\Delta$ GE suppression of a gene transcript. Gene symbols in red font were further examined in this study. A detailed description of the experiment is given in Figure 8A.

| Gene symbol          | Gene name                                                                            | $\Delta$ GE <sup>a</sup><br>IL-1 $\beta$ | $\Delta$ GE <sup>a</sup><br>sh <i>Kras</i> | $\Delta$ GE <sup>a</sup><br>sh <i>Chuk</i> |
|----------------------|--------------------------------------------------------------------------------------|------------------------------------------|--------------------------------------------|--------------------------------------------|
| <i>Ppbbp</i>         | pro-platelet basic protein                                                           | 1,81                                     | -3,00                                      | -1,31                                      |
| <i>Cxcl1</i>         | chemokine (C-X-C motif) ligand 1                                                     | 2,40                                     | -1,93                                      | -1,28                                      |
| <i>A4galt</i>        | alpha 1,4-galactosyltransferase                                                      | 0,74                                     | -1,08                                      | -1,22                                      |
| <i>Wdyhv1</i>        | WDYHV motif containing 1                                                             | 0,59                                     | -0,58                                      | -1,72                                      |
| <i>Taf1d</i>         | Tbp-associated factor, RNA polymerase I, D                                           | 0,96                                     | -0,83                                      | -1,08                                      |
| <i>Ifi44</i>         | interferon-induced protein 44                                                        | 0,75                                     | -0,94                                      | -0,86                                      |
| <i>Nol10</i>         | nucleolar protein 10                                                                 | 1,40                                     | -0,60                                      | -0,41                                      |
| <i>Mmp9</i>          | matrix metalloproteinase 9                                                           | 0,90                                     | -0,45                                      | -0,95                                      |
| <i>Caprin2</i>       | caprin family member 2                                                               | 1,04                                     | -0,58                                      | -0,57                                      |
| <i>Dut</i>           | deoxyuridine triphosphatase                                                          | 0,40                                     | -0,54                                      | -0,75                                      |
| <i>Fam160a1</i>      | family with sequence similarity 160, A1                                              | -0,46                                    | 0,71                                       | 0,55                                       |
| <i>Ipo4</i>          | importin 4                                                                           | -0,57                                    | 0,58                                       | 0,66                                       |
| <i>1810010H24Rik</i> | RIKEN cDNA 1810010H24 gene                                                           | -0,61                                    | 0,83                                       | 0,49                                       |
| <i>Zfp300</i>        | zinc finger protein 300                                                              | -1,11                                    | 0,45                                       | 0,48                                       |
| <i>Camta2</i>        | calmodulin binding transcription activator 2                                         | -0,66                                    | 0,64                                       | 0,77                                       |
| <i>Mbd6</i>          | methyl-CpG binding domain protein 6                                                  | -0,63                                    | 1,12                                       | 0,44                                       |
| <i>Spice1</i>        | spindle and centriole associated protein 1                                           | -1,16                                    | 0,67                                       | 0,43                                       |
| <i>Scarf2</i>        | scavenger receptor class F, member 2                                                 | -1,01                                    | 0,68                                       | 0,65                                       |
| <i>Ldlr</i>          | low density lipoprotein receptor                                                     | -0,47                                    | 1,01                                       | 0,93                                       |
| <i>Rab32</i>         | RAB32, member RAS oncogene family                                                    | -0,92                                    | 0,56                                       | 1,00                                       |
| <i>Tgfb3</i>         | transforming growth factor, beta 3                                                   | -1,65                                    | 0,53                                       | 0,43                                       |
| <i>Galnt10</i>       | UDP-N-ac- $\alpha$ -D-galactosamine:polypeptide N-acetylgalactosaminyltransferase 10 | -1,42                                    | 0,68                                       | 0,57                                       |
| <i>Neto2</i>         | neuropilin (NRP) and tolloid (TLL)-like 2                                            | -1,06                                    | 0,44                                       | 1,74                                       |
| <i>Cpt1c</i>         | carnitine palmitoyltransferase 1c                                                    | -2,09                                    | 0,55                                       | 0,69                                       |
| <i>Arsj</i>          | arylsulfatase J                                                                      | -1,82                                    | 1,00                                       | 0,87                                       |
| <i>Pmp22</i>         | peripheral myelin protein 22                                                         | -1,33                                    | 0,90                                       | 1,62                                       |
| <i>Fah</i>           | fumarylacetoacetate hydrolase                                                        | -2,04                                    | 0,91                                       | 1,12                                       |
| <i>Ephx1</i>         | epoxide hydrolase 1, microsomal                                                      | -0,96                                    | 1,62                                       | 1,52                                       |
| <i>Efnb2</i>         | ephrin B2                                                                            | -2,63                                    | 1,39                                       | 0,65                                       |
| <i>Ppargc1a</i>      | peroxisome proliferative activated receptor, gamma, coactivator 1 alpha              | -1,58                                    | 3,30                                       | 1,64                                       |

<sup>a</sup>  $\Delta$ GE, difference in gene expression.

**Supplementary Table 5. Microarray results from MC38 cells** Twenty transcripts altered more than 1.3-fold in MC38 colon adenocarcinoma cells treated with 20 ng/mL rmIL-1 $\beta$  (in one direction) and in Lewis lung carcinoma cells stably expressing anti-*Kras* or anti-*Chuk* shRNA (in the other direction), as assessed by microarray (mouse Gene ST2.0, Affymetrix, Sta.Clara, CA). A positive  $\Delta$ GE indicates induction and a negative  $\Delta$ GE suppression of a gene transcript. Gene symbols in red font were further examined in this study. A detailed description of the experiment is given in Figure 8A.

| Gene symbol         | Gene name                                                                                      | $\Delta$ GE <sup>a</sup><br>IL-1 $\beta$ | $\Delta$ GE <sup>a</sup><br>sh <i>Kras</i> | $\Delta$ GE <sup>a</sup><br>sh <i>Chuk</i> |
|---------------------|------------------------------------------------------------------------------------------------|------------------------------------------|--------------------------------------------|--------------------------------------------|
| <i>Cxcl1</i>        | chemokine (C-X-C motif) ligand 1                                                               | 3,19                                     | -0,87                                      | -1,29                                      |
| <i>Grem1</i>        | gremlin 1                                                                                      | 0,50                                     | -1,79                                      | -1,48                                      |
| <i>Mmp3</i>         | matrix metalloproteinase 3                                                                     | 1,92                                     | -1,27                                      | -0,47                                      |
| <i>Mmp13</i>        | matrix metalloproteinase 13                                                                    | 0,46                                     | -0,72                                      | -2,09                                      |
| <i>Alcam</i>        | activated leukocyte cell adhesion molecule                                                     | 0,73                                     | -1,41                                      | -1,02                                      |
| <i>Hgf</i>          | hepatocyte growth factor                                                                       | 1,16                                     | -0,86                                      | -1,11                                      |
| <i>Creb5</i>        | cAMP responsive element binding protein 5                                                      | 0,74                                     | -1,55                                      | -0,80                                      |
| <i>Adamts7</i>      | a disintegrin-like and metalloproteinase (reprolysin type) with thrombospondin type 1 motif, 7 | 0,44                                     | -1,23                                      | -1,01                                      |
| <i>Sema6d</i>       | sema domain, transmembrane domain (TM), and cytoplasmic domain, (semaphorin) 6D                | 0,45                                     | -1,29                                      | -0,71                                      |
| <i>Rin2</i>         | Ras and Rab interactor 2                                                                       | 0,41                                     | -0,86                                      | -1,12                                      |
| <i>Syne1</i>        | spectrin repeat containing, nuclear envelope 1                                                 | -1,31                                    | -1,05                                      | -2,39                                      |
| <i>Procr</i>        | protein C receptor, endothelial                                                                | 0,66                                     | -0,41                                      | -0,86                                      |
| <i>Dgkh</i>         | diacylglycerol kinase, eta                                                                     | 0,56                                     | -0,51                                      | -0,41                                      |
| <i>LOC101056159</i> | uncharacterized LOC101056159                                                                   | -0,41                                    | 0,54                                       | 0,82                                       |
| <i>Olfir1251</i>    | olfactory receptor 1251                                                                        | -0,64                                    | 0,45                                       | 0,71                                       |
| <i>H2-Q5</i>        | histocompatibility 2, Q region locus 5                                                         | -0,62                                    | 0,43                                       | 0,92                                       |
| <i>Eif4a2</i>       | eukaryotic translation initiation factor 4A2                                                   | -0,43                                    | 0,42                                       | 1,39                                       |
| <i>LOC102633783</i> | sp110 nuclear body protein-like                                                                | -1,20                                    | 0,42                                       | 1,10                                       |
| <i>Lgals9</i>       | lectin, galactose binding, soluble 9                                                           | -1,43                                    | 1,52                                       | 1,03                                       |
| <i>Apol9b</i>       | apolipoprotein L 9b                                                                            | -2,52                                    | 1,48                                       | 0,52                                       |

<sup>a</sup>  $\Delta$ GE, difference in gene expression.

**Supplementary Table 6. PCR primers used for these studies.**

| Method <sup>a</sup> | Primer           | Sequence                          | Amplicon (bp) |
|---------------------|------------------|-----------------------------------|---------------|
| qPCR                | Tnfrsf1aF        | CAACGTCCTGACAATGCAGA              | 129           |
| qPCR                | Tnfrsf1aR        | CTGCATCTCCAGCCTCTCGA              |               |
| qPCR                | Il1r1F           | TGGAAGTCTTGTGTGCCCTT              | 150           |
| qPCR                | Il1r1R           | GCCACATTCTCACCACAG                |               |
| qPCR                | Il1βF            | TTTGACAGTGATGAGAATGACC            | 162           |
| qPCR                | Il1βR            | AATGAGTGATACTGCCTGCC              |               |
| qPCR                | Cxcl1F           | CTTGACCCTGAAGCTCCCTT              | 127           |
| qPCR                | Cxcl1R           | GTTGTCAGAAGCCAGCGTTC              |               |
| qPCR                | GusbF            | TTACTTTAAGACGCTGATCACC            | 165           |
| qPCR                | GusbR            | ACCTCCAAATGCCCATAGTC              |               |
| PCR                 | Mycoplasma Spp.F | GGGAGCAAACAGGATTAGATACCCT         | 270           |
| PCR                 | Mycoplasma Spp.R | TGCACCATCTGTCACTCTGTTAACCTC       |               |
| CL                  | mKrasF           | GGAGATCTATGACTGAGTATAAACTTGTGGTGG | 583           |
| CL                  | mKrasR           | GGGAATTCTCACATAACTGTACACCTTGTCTT  |               |
| CL                  | ChukF            | ATGGGCGGCCCCCGGGGCTGCGGC          | 2238          |
| CL                  | ChukR            | TCATTCTGCTAACCAACTCCAATC          |               |
| CL                  | IkbkbF           | ATGAGCTGGTCACCGTCCCTCCCAACCC      | 2274          |
| CL                  | IkbkbR           | TCAGTCACAGGCCTGCTCCAGGC           |               |
| CL                  | IkbkeF           | ATGCAGAGTACCACTAACTACCTGTGGC      | 1900          |
| CL                  | IkbkeR           | TCAGACATCTGGTGCCGATGGAA           |               |
| CL                  | Tbk1F            | ATGCAGAGCACCTCCAACCATCTGTGGC      | 2191          |
| CL                  | Tbk1R            | CTAAAGACAGTCCACATTGCGAAGGCCA      |               |

<sup>a</sup>Application: PCR, DNA polymerase chain reaction; qPCR, quantitative (real-time) PCR.  
CL, cloning.

Provider: VBC Biotech, Vienna, Austria.

**Supplementary Table 7. Antibodies used for these studies**

| Method <sup>a</sup> | Target                              | Provider <sup>b</sup> | Catalog #        | Dilution     | Conjugate <sup>c</sup> |
|---------------------|-------------------------------------|-----------------------|------------------|--------------|------------------------|
| IF,WIB              | <i>RelA</i>                         | Santa Cruz            | Sc-372           | 1:200, 1:500 | -                      |
| IF, WIB             | <i>RelB</i>                         | Santa Cruz            | Sc-30887         | 1:200, 1:500 | -                      |
| WIB                 | IKK $\alpha$                        | Cell Signaling        | 2682             | 1:1000       | -                      |
| WIB, ChIP           | IKK $\beta$                         | Cell Signaling        | 2684             | 1:1000       | -                      |
| WIB                 | IKK $\epsilon$                      | Cell Signaling        | 2690             | 1:1000       | -                      |
| WIB                 | TBK1                                | Cell Signaling        | 3013             | 1:1000       | -                      |
| WIB                 | I $\kappa$ B $\alpha$               | Santa Cruz            | Sc-371           | 1:500        | -                      |
| WIB                 | I $\kappa$ B $\beta$                | Santa Cruz            | Sc-9130          | 1:500        | -                      |
| WIB                 | $\beta$ -actin                      | Santa Cruz            | sc-47778         | 1:500        | -                      |
| WIB                 | Goat anti-rabbit IgG                | Southern Biotech      | 4030-05          | 1:8000       | HRP                    |
| WIB                 | Goat anti-mouse IgG                 | Southern Biotech      | 1030-05          | 1:8000       | HRP                    |
| IF                  | donkey anti-rabbit & anti-mouse IgG | Invitrogen            | A21206<br>A21202 | 1:1000       | Alexa 488              |
| IF                  | donkey anti-rabbit & anti-mouse IgG | Invitrogen            | A10042<br>A10037 | 1:1000       | Alexa 568              |
| ChIP, EMSA          | <i>RelA</i>                         | Santa Cruz            | Sc-372 X         | 1:60         | -                      |
| ChIP, EMSA          | <i>RelB</i>                         | Santa Cruz            | Sc-226 X         | 1:60         | -                      |
| ChIP                | IKK $\alpha$                        | Santa Cruz            | Sc-7606 X        | 1:60         | -                      |

<sup>a</sup>Application: IF, immunofluorescence; WIB, Western immunoblotting; ChIP, Chromatin Immunoprecipitation; EMSA; electrophoretic mobility shift assay

<sup>b</sup>Providers: Cell Signaling, Danvers MA, USA; Santa Cruz Biotechnology, Dallas, TX; Southern Biotech, Birmingham, AL; Invitrogen, Carlsbad, CA.

<sup>c</sup>Conjugates: HRP, horse radish peroxidase.

**Supplementary Table 8. Lentiviral shRNA pools used for these studies.**

| Target       | Abbreviation    | Catalog #   | Target Sequences                                                         |
|--------------|-----------------|-------------|--------------------------------------------------------------------------|
| random       | shC             | sc-108080-V | target sequence proprietary                                              |
| <i>Chuk</i>  | sh <i>Chuk</i>  | sc-29366-V  | CCATGGTGTTTGAATGTATTT<br>CTCTCAGTGTGTTCTAGATTT<br>GCAAGCAGAAGATTATTGATT  |
| <i>Ikbkb</i> | sh <i>Ikbkb</i> | sc-35645-V  | GATGACATCTTGAAC TTGATT<br>CTGCACATTTGAATCTGTATT<br>CAGCTCTCTTAGACAGTTATT |
| <i>Ikbke</i> | sh <i>Ikbke</i> | sc-39057-V  | GAGATCATGTACAGAATCATT<br>CAGTGTTGTTTGGACAAGATT<br>CCAACAACTAGCATTACTTT   |
| <i>Tbk1</i>  | sh <i>Tbk1</i>  | sc-39059-V  | GTAGGACTGAGATATGAAATT<br>GCATCACAGAGATTTACTATT<br>GAAGTTCTAGTTTGCACAATT  |
| <i>Kras</i>  | sh <i>Kras</i>  | sc-43876-V  | CTACAGGAAACAAGTAGTA<br>GAACAGTAGACACGAAACA<br>CCATTCAGTTTCCATGTTA        |

Provider: Santa Cruz Biotechnology, Dallas, TX.
